# Supplementary material for: Exploring the working mechanism of Li+ in O3-type NaLi0.1Ni0.35Mn0.55O2 cathode materials for rechargeable Na-ion batteries
Source: Royal Society of Chemistry journal article supplement (doi:10.1039/c6ta02230h), 2016-01-01
Supplement: c6ta02230h1.pdf [file c6ta02230h1.pdf]

## Supplementary Information

### Exploring the Working Mechanism of Li<sup>+</sup> in O3-type

### NaLi<sub>0.1</sub>Ni<sub>0.35</sub>Mn<sub>0.55</sub>O<sub>2</sub> Cathode Materials for Rechargeable Na-ion

### Batteries

Shiyao Zheng<sup>a</sup>, Guiming Zhong<sup>a</sup>, Matthew J. McDonald<sup>a</sup>, Zhengliang Gong<sup>b</sup>, Rui Liu<sup>a</sup>, Wen Wen<sup>c</sup>, Chun Yang<sup>b</sup>, Yong Yang<sup>\*ab</sup>

<sup>a</sup> State Key Lab of Physical Chemistry of Solid Surfaces, Collaborative Innovation Center of Chemistry for Energy Materials and Department of Chemistry, Xiamen University, Xiamen 361005, China

<sup>b</sup> School of Energy Research, Xiamen University, Xiamen 361005, China

<sup>c</sup> Shanghai Synchrotron Radiation Facility, Shanghai Institute of Applied Physics, Chinese Academy of Science, Shanghai 201204, China

**Table S1.** ICP results of NaLi<sub>0.1</sub>Ni<sub>0.35</sub>Mn<sub>0.55</sub>O<sub>2</sub> (NLNMO).

|             | Na   | Li   | Ni   | Mn   |
|-------------|------|------|------|------|
| Theoretical | 1.00 | 0.10 | 0.35 | 0.55 |
| Measured    | 1.00 | 0.10 | 0.34 | 0.56 |

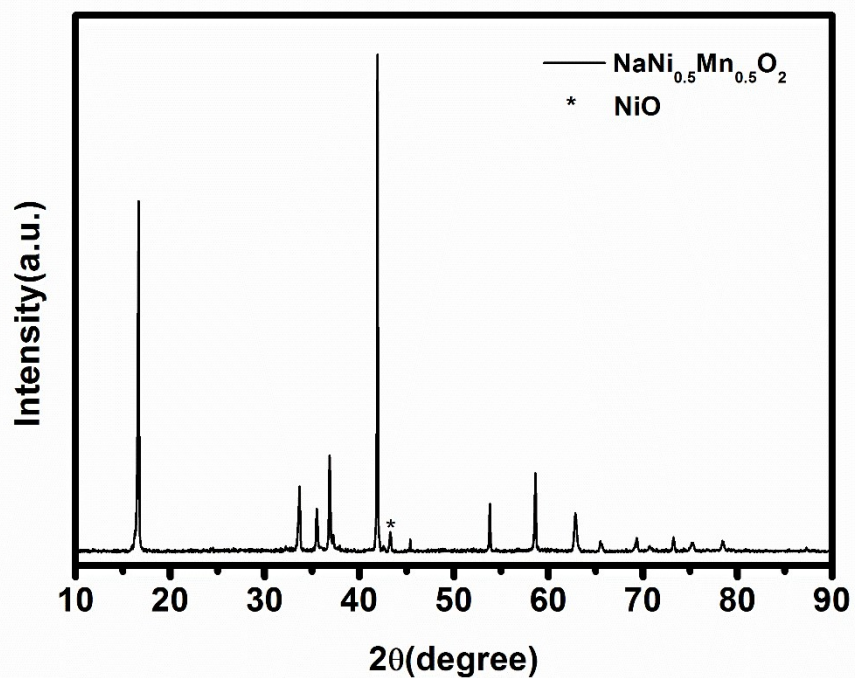

**Figure S1.** XRD patterns of NNMO. The asterisk represents the NiO impurity.

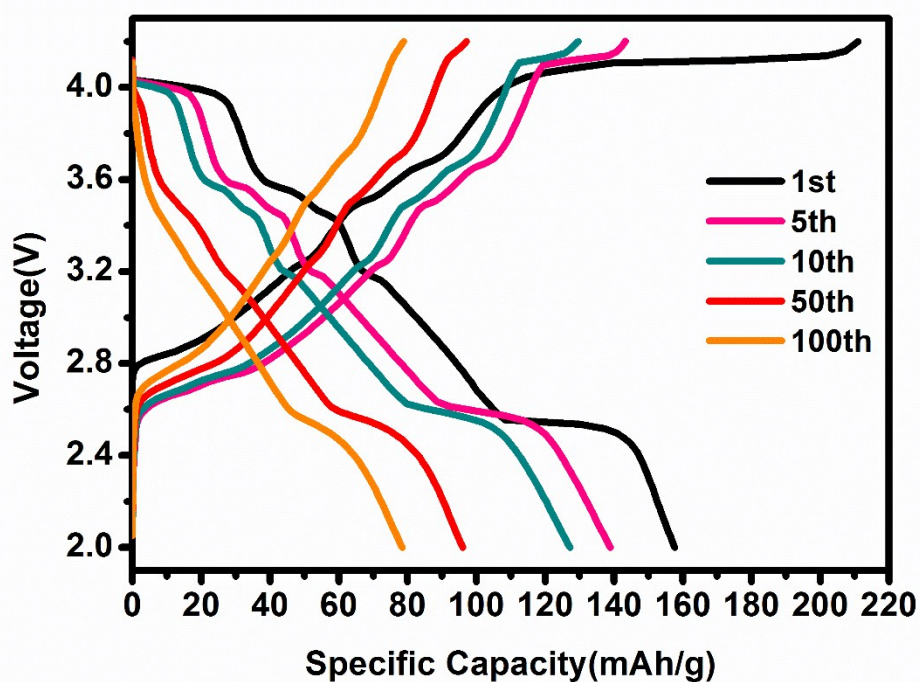

**Figure S2.** Charge/discharge profiles of NNMO between 2.0 V and 4.2 V at a rate of  $12\text{mA g}^{-1}$ .

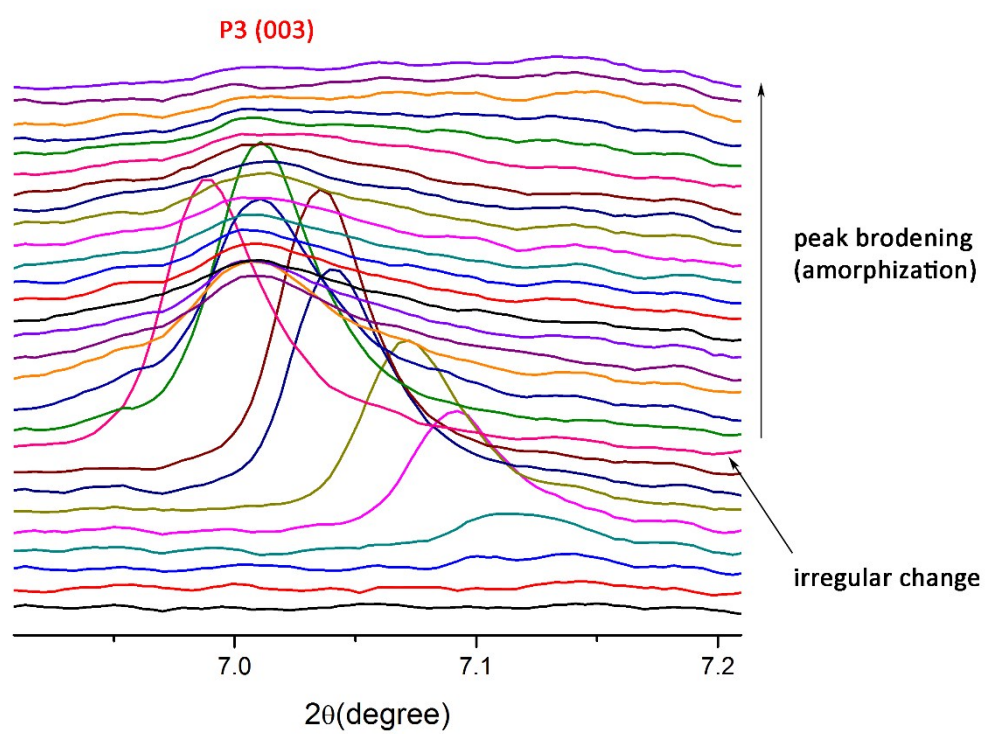

**Figure S3.** A detailed view of the irregular changes and peak broadening of the P3 (003) peak of an NNMO electrode.

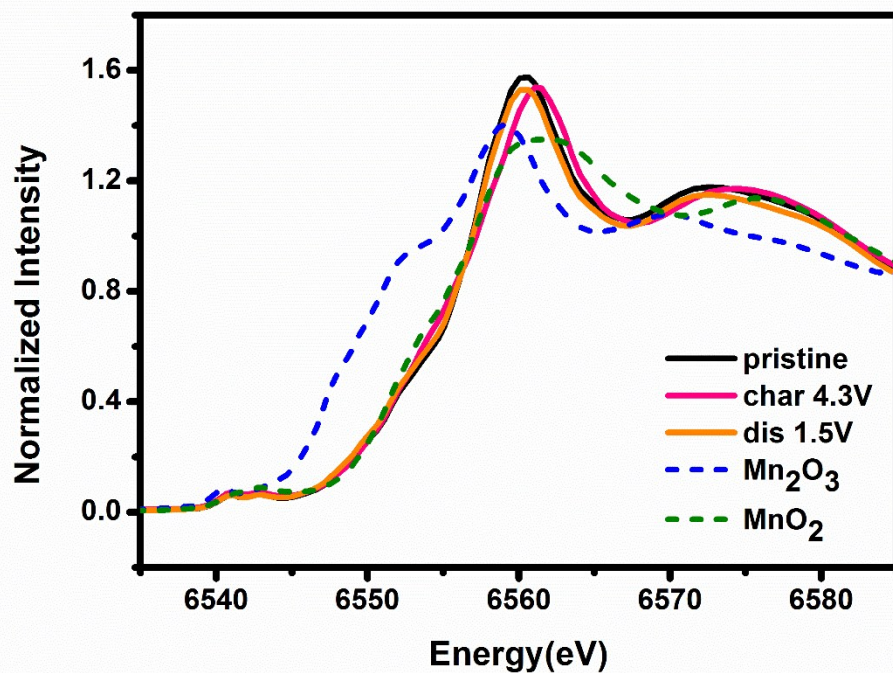

**Figure S4.** Ex situ XANES spectra at the Mn K-edge of NLNMO at different state of charge, including Mn<sub>2</sub>O<sub>3</sub> and MnO<sub>2</sub> standard spectra.

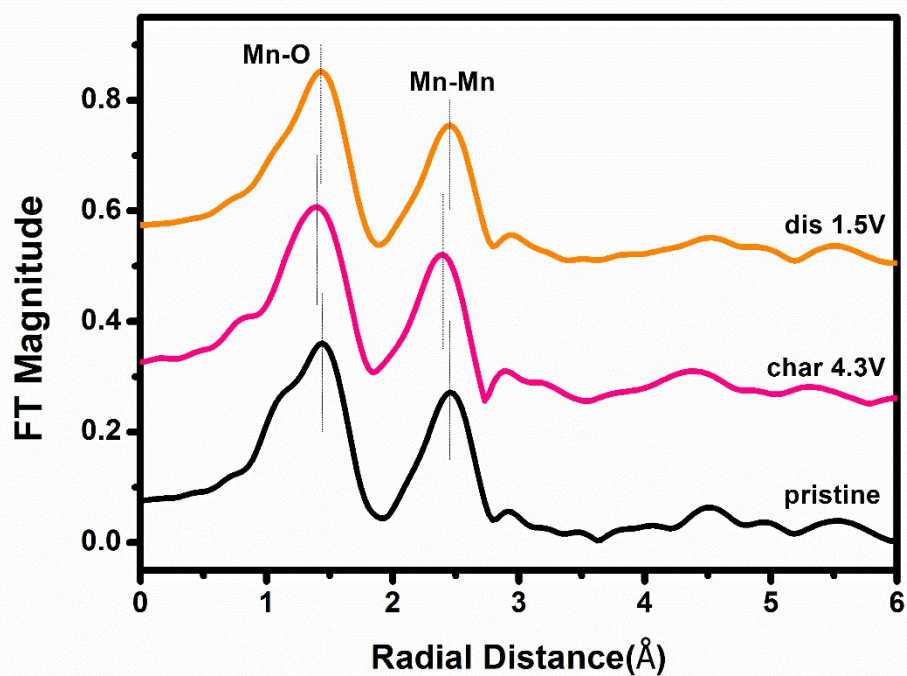

**Figure S5.** Ex situ EXAFS spectra at the Mn K-edge of NLNMO at different state of charge.



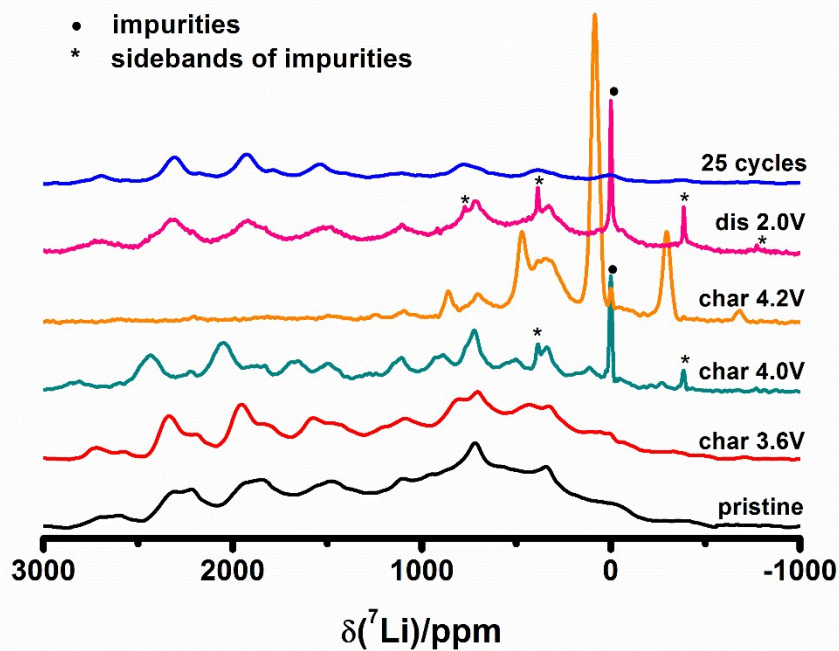

**Figure S6.**  $^7\text{Li}$  spin-echo NMR spectra of NLNMO. In the data, black dots represent impurities and asterisks represent the sidebands of impurity peaks.

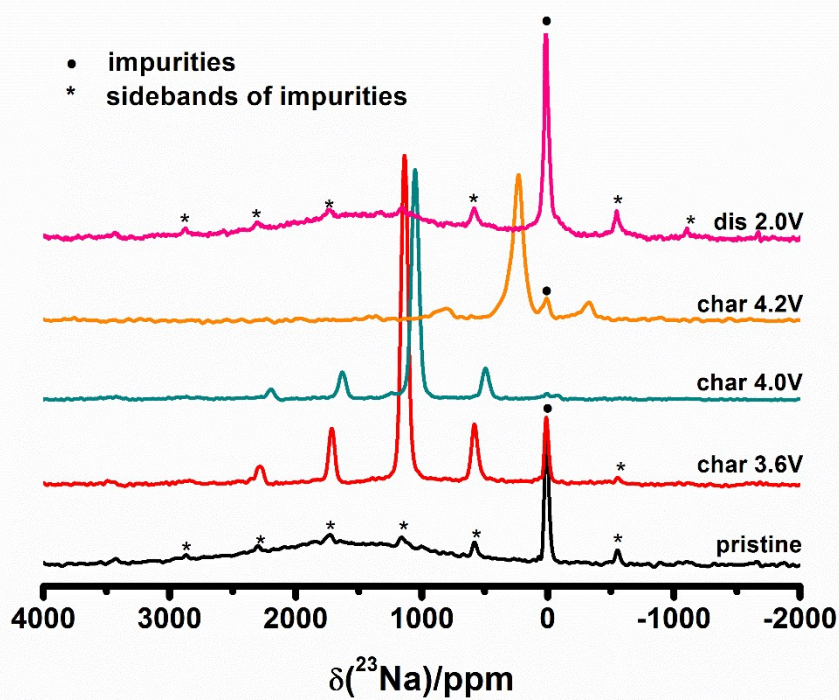

**Figure S7.**  $^{23}\text{Na}$  spin-echo NMR spectra of NLNMO. In the data, black dots represent impurities and asterisks represent the sidebands of impurity peaks.
